# Supplementary material for: Robustness Analysis and Behavior Discrimination in Enzymatic Reaction Networks
Source: PLOS journal article supplement (doi:10.1371/journal.pone.0024246), 2011-09-27
Supplement: S2 (10.1371/journal.pone.0024246.s002) [file journal.pone.0024246.s002]

# Note on Computing Local Sensitivity for Satisfaction Function

This technical appendix describes briefly how to compute the local sensitivity of the robust satisfaction function for a formula  $\varphi$ . If  $\varphi$  is a simple predicate  $\mu$ , this is achieved by applying the chain rule to get the derivative of the function  $\mu(\xi, \tau)$ , as follows. To simplify, let us assume that  $\xi$  depends only on a parameter  $p$ . We have

$$\frac{d\rho(\mu, \xi_p, \tau)}{dp} = \frac{d\mu(\xi_p, \tau)}{dp} = \frac{\partial \mu}{\partial \xi_p}(\xi_p, \tau) \frac{d\xi_p}{dp} \quad (1)$$

where the second term in the multiplication is provided by the sensitivity function. For formulas  $\varphi$  involving Boolean and temporal operators, the function  $\rho(\varphi, \xi_p, \tau)$  is obtained as a result of maximum and minimum operations on the predicates appearing in  $\varphi$  so that at the end there is at least one pair of (predicate, time)  $(\mu_i, \tau_i^* \geq \tau)$ , such that  $\rho(\varphi, \xi_p, \tau) = \mu_i(\xi_p, \tau_i^*)$ . If this pair is unique, then the derivative of  $\rho$  at  $\tau$  is simply the same as the derivative of  $\mu_i$  at  $\tau_i^*$ , i.e.,  $\frac{d\rho}{dp_i}(\varphi, \xi_p, \tau) = \frac{d\rho}{dp_i}(\mu_i, \xi_p, \tau_i^*)$ . Otherwise, if there is another pair  $(\mu_j, \tau_j^*)$  such that  $\rho(\varphi, \xi_p, \tau) = \mu_i(\xi_p, \tau_i^*) = \mu_j(\xi_p, \tau_j^*)$  then  $\rho$  may not have a derivative in  $(p, \tau)$ . Indeed, we know that the derivative with respect to  $x$  of  $\max(f(x), g(x))$  (or  $\min(f(x), g(x))$ ) may not be defined when  $f(x_0) = g(x_0)$ , even if both have a derivative in  $x_0$ . In this case, though,  $\rho$  has a left-derivative and a right-derivative which can be computed, as discussed in [1].

## References

1. Donzé A, Maler O (2010) Robust satisfaction of temporal logic over real-valued signals. In: Chatterjee K, Henzinger TA, editors, FORMATS. Springer, volume 6246 of *Lecture Notes in Computer Science*, pp. 92-106.
